# Supplementary material
Source: HighWire-hosted journal article supplement (https://erj.ersjournals.com/content/55/2/1902172)
Supplement: inline-supplementary-material-1 [file inline-supplementary-material-1.pdf]

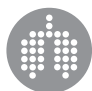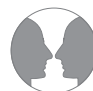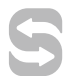

SHAREABLE PDF

# Defining “stable chronic hypercapnia” in patients with COPD: the physiological perspective

Caroline Hedsund<sup>1</sup>, Torgny Rostrup Wilcke<sup>1</sup> and Ronan M.G. Berg<sup>2,3</sup>

**Affiliations:** <sup>1</sup>Dept of Pulmonary Medicine, Gentofte Hospital, Hellerup, Denmark. <sup>2</sup>Dept of Biomedical Sciences, Faculty of Health and Medical Sciences, University of Copenhagen, Copenhagen, Denmark. <sup>3</sup>Dept of Clinical Physiology, Nuclear Medicine and PET, Rigshospitalet, University Hospital of Copenhagen, Copenhagen, Denmark.

**Correspondence:** Ronan M.G. Berg, Dept of Biomedical Sciences, Faculty of Health and Medical Sciences, University of Copenhagen, Blegdamsvej 3, DK-2200 Copenhagen, Denmark. E-mail: [ronan@sund.ku.dk](mailto:ronan@sund.ku.dk)

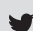

@ERSpublications

A time period of 2–4 weeks is required before a state of “stable chronic hypercapnia” is likely to be present following an acute COPD exacerbation <http://bit.ly/2D4lOok>

**Cite this article as:** Hedsund C, Wilcke TR, Berg RMG. Defining “stable chronic hypercapnia” in patients with COPD: the physiological perspective. *Eur Respir J* 2020; 55: 1902172 [<https://doi.org/10.1183/13993003.02172-2019>].

This single-page version can be shared freely online.

## To the Editor:

We read with interest the “European Respiratory Society guidelines on long-term home non-invasive ventilation for management of COPD” [1]. In recent years, several studies have attempted to improve outcomes by using home non-invasive ventilation in patients with end-stage COPD who suffer from chronic hypercapnic respiratory failure (CHRF). As noted in the guidelines, the definition of “stable chronic hypercapnia” following an acute exacerbation has historically been ambiguous, which has probably contributed to the inconsistent findings across clinical trials of home non-invasive ventilation [1].
